# Supplementary material for: Discovering human transcription factor physical interactions with genetic variants, novel DNA motifs, and repetitive elements using enhanced yeast one-hybrid assays
Source: PubMed Central journal article supplement — Genome Res. 2019 Sep;29(9):1533–44. doi: 10.1101/gr.248823.119 (PMC6724672; doi:10.1101/gr.248823.119), 2019-09
Supplement: supp_gr.248823.119_Supplemental_Fig_S1.pdf [file supp_gr.248823.119_Supplemental_Fig_S1.pdf]

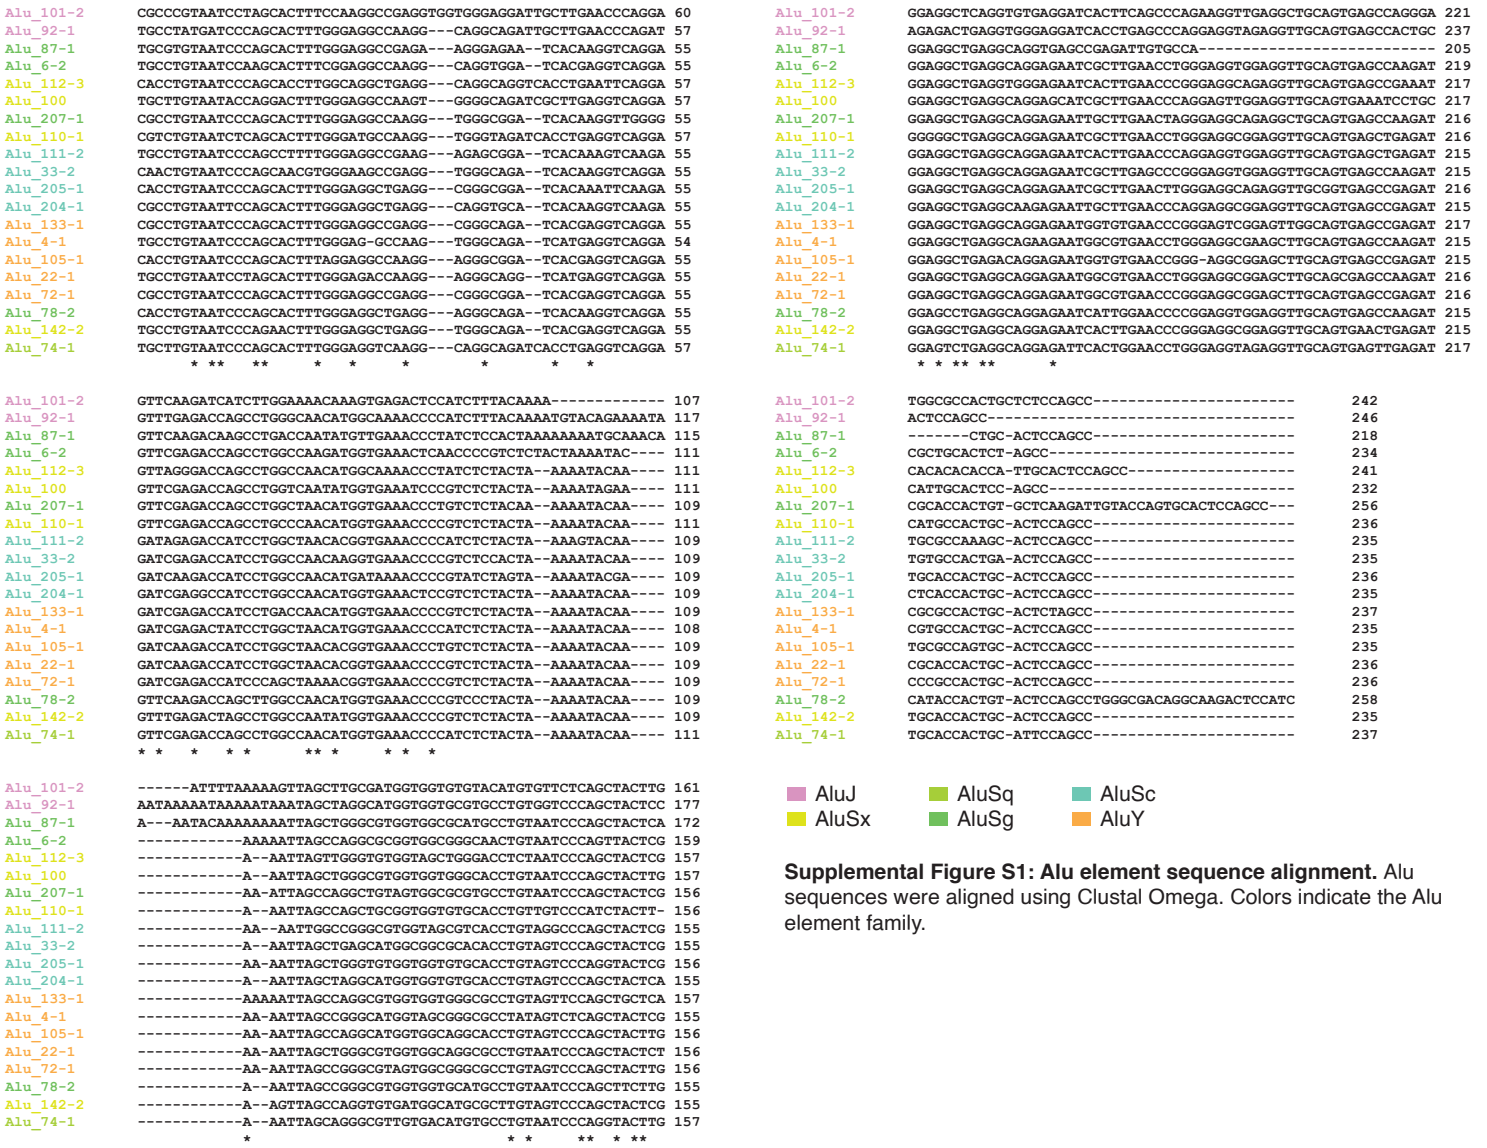

Supplemental Figure S1: Alu element sequence alignment. Alu sequences were aligned using Clustal Omega. Colors indicate the Alu element family.
