# Supplementary material for: Discovering human transcription factor physical interactions with genetic variants, novel DNA motifs, and repetitive elements using enhanced yeast one-hybrid assays
Source: PubMed Central journal article supplement — Genome Res. 2019 Sep;29(9):1533–44. doi: 10.1101/gr.248823.119 (PMC6724672; doi:10.1101/gr.248823.119), 2019-09
Supplement: supp_gr.248823.119_Supplemental_Fig_S2.pdf [file supp_gr.248823.119_Supplemental_Fig_S2.pdf]

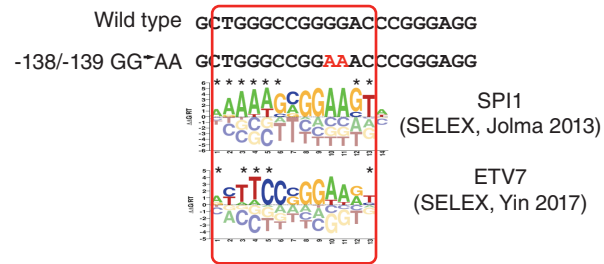

**Supplemental Figure S2: Alignment of the sequence flanking the -139/-139 GG→AA mutation with SPI1 and ETV7 motifs.** SPI1 and ETV7 motifs were aligned to the genomic region flanking the -138/-139 GG→AA mutation. Asterisks indicate nucleotides that do not match the mutant sequence.
