# Supplementary material for: Discovering human transcription factor physical interactions with genetic variants, novel DNA motifs, and repetitive elements using enhanced yeast one-hybrid assays
Source: PubMed Central journal article supplement — Genome Res. 2019 Sep;29(9):1533–44. doi: 10.1101/gr.248823.119 (PMC6724672; doi:10.1101/gr.248823.119), 2019-09
Supplement: supp_gr.248823.119_Supplemental_Fig_S3.pdf [file supp_gr.248823.119_Supplemental_Fig_S3.pdf]

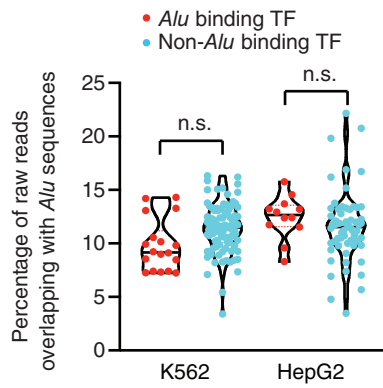

**Supplemental Figure S3: Percentage of raw ChIP-seq reads that overlap with *Alu* sequences.** The percentage of raw ChIP-seq reads that overlap with *Alu* sequences is plotted for TFs that bind to 20% or more of the *Alu* sequences tested by eY1H assays (red) and TFs for which we did not detect binding to *Alu* sequences (blue). ChIP-seq data was obtained from the ENCODE Project for the K562 and HepG2 cell lines. Violin plots are shown, and the median is indicated by a solid black line. Statistical significance evaluated by one-tailed Mann-Whitney *U* test.
