# Supplementary material for: Discovering human transcription factor physical interactions with genetic variants, novel DNA motifs, and repetitive elements using enhanced yeast one-hybrid assays
Source: HighWire-hosted journal article supplement (doi:10.1101/gr.248823.119), 2019-09-01
Supplement: Supplemental_Table_S2.xlsx [file Supplemental_Table_S2.xlsx]

## Sheet: Alu sequences
Bait ID	Alu family	Alu superfamily	Prey Array Coordinate	TF Ensembl ID	TF name	TF family	Average Raw Normalized Intensity	Average Row Column Normalized Intensity	Average Bait to Bait Normalized Intensity	Average Z-score	Average Z-Prime
Alu_100	AluSx1	AluS	8-H9	ENSG00000185551	NR2F2	ZF - NHR	229.75	220.702	116.555	0.941452	0.534602
Alu_100	AluSx1	AluS	1-C5	ENSG00000164532	TBX20	T-BOX	232.75	236.352	124.379	2.05477	1.15584
Alu_100	AluSx1	AluS	1-E6	ENSG00000172819	RARG	ZF - NHR	233.5	230.999	121.562	1.67557	0.942539
Alu_100	AluSx1	AluS	1-G12	ENSG00000177463	NR2C2	ZF - NHR	235	222.238	116.952	1.05496	0.593431
Alu_100	AluSx1	AluS	12-A12	ENSG00000141052	MYOCD	RPEL	238.25	232.435	116.137	0.911778	0.485536
Alu_100	AluSx1	AluS	12-C4	ENSG00000171443	ZNF524	HMG, ZF - C2H2	228.75	232.819	116.328	0.937579	0.499276
Alu_100	AluSx1	AluS	2-A12	ENSG00000173545	ZNF622	ZF - C2H2	229	218.863	115.176	0.815913	0.458965
Alu_100	AluSx1	AluS	2-D3	ENSG00000171425	ZNF581	ZF - C2H2	242	245.167	129.018	2.67924	1.50712
Alu_100	AluSx1	AluS	2-H5	ENSG00000153786	ZDHHC7	ZF - DHHC	232	222.635	117.161	1.08311	0.609266
Alu_100	AluSx1	AluS	3-B8	ENSG00000186350	RXRA	ZF - NHR	224.5	226.349	119.115	1.34621	0.757265
Alu_100	AluSx1	AluS	4-D3	ENSG00000125945	ZNF436	ZF - C2H2	243	249.794	131.453	3.00702	1.6915
Alu_100	AluSx1	AluS	4-F1	ENSG00000143171	RXRG	ZF - NHR	240	233.066	122.65	1.822	1.0249
Alu_100	AluSx1	AluS	4-H7	ENSG00000124216	SNAI1	ZF - C2H2	229.5	225.105	118.46	1.25804	0.707668
Alu_100	AluSx1	AluS	6-H5	ENSG00000188818	ZDHHC11	ZF - DHHC	225	219.839	116.099	0.880097	0.499762
Alu_100	AluSx1	AluS	7-B3	ENSG00000144852	NR1I2	ZF - NHR	244.25	248.998	131.498	2.95302	1.67687
Alu_100	AluSx1	AluS	8-A4	ENSG00000109787	KLF3	ZF - C2H2	238.5	248.475	131.222	2.91579	1.65573
Alu_100	AluSx1	AluS	8-E11	ENSG00000186908	ZDHHC17	ZF - DHHC	225.5	222.249	117.372	1.05146	0.597069
Alu_100	AluSx1	AluS	8-G1	ENSG00000185551	NR2F2	ZF - NHR	241.5	232.451	122.759	1.77668	1.00888
Alu_101-2	AluJr	AluJ	1-C5	ENSG00000164532	TBX20	T-BOX	125	129.158	145.28	4.86822	5.77516
Alu_101-2	AluJr	AluJ	1-H5	ENSG00000151090	THRB	ZF - NHR	133.25	125.714	141.406	4.34675	5.15654
Alu_101-2	AluJr	AluJ	11-D7	ENSG00000156150	ALX3	HD	115.75	116.674	133.189	3.2072	3.62522
Alu_101-2	AluJr	AluJ	12-E12	ENSG00000106006	HOXA6	HD - HOX	127.75	118.358	135.111	3.46594	3.91769
Alu_101-2	AluJr	AluJ	12-F1	ENSG00000109381	ELF2	WH - ETS	116.5	112.614	128.554	2.58335	2.92006
Alu_101-2	AluJr	AluJ	2-E12	ENSG00000105722	ERF	WH - ETS	125	118.754	133.577	3.29292	3.90639
Alu_101-2	AluJr	AluJ	4-B3	ENSG00000122145	TBX22	T-BOX	149.25	157.463	177.118	9.15402	10.8594
Alu_101-2	AluJr	AluJ	8-H3	ENSG00000152804	HHEX	HD	132.75	121.754	139.539	4.03539	4.93372
Alu_105-1	AluYk3	AluY	8-G1	ENSG00000185551	NR2F2	ZF - NHR	111	103.842	121.23	1.57086	2.00228
Alu_105-1	AluYk3	AluY	1-C5	ENSG00000164532	TBX20	T-BOX	104.25	109.592	127.122	2.42395	2.96355
Alu_105-1	AluYk3	AluY	2-F8	ENSG00000154957	ZNF18	ZF - C2H2	158.75	160.669	186.369	10.3994	12.7144
Alu_105-1	AluYk3	AluY	2-H5	ENSG00000153786	ZDHHC7	ZF - DHHC	134.5	128.696	149.282	5.40696	6.61062
Alu_105-1	AluYk3	AluY	4-A5	ENSG00000102383	ZDHHC15	ZF - DHHC	103.75	105.55	122.434	1.79288	2.192
Alu_110-1	AluSx	AluS	1-C5	ENSG00000164532	TBX20	T-BOX	187	181.345	139.998	4.15724	3.09382
Alu_110-1	AluSx	AluS	1-G12	ENSG00000177463	NR2C2	ZF - NHR	223.25	201.958	155.911	6.29932	4.68795
Alu_110-1	AluSx	AluS	1-H5	ENSG00000151090	THRB	ZF - NHR	204	182.628	140.988	4.29052	3.193
Alu_110-1	AluSx	AluS	11-D7	ENSG00000156150	ALX3	HD	191.75	210.298	156.696	6.37156	4.77135
Alu_110-1	AluSx	AluS	12-E2	ENSG00000066336	SPI1	WH - ETS	185.75	182.205	135.763	3.55375	2.66123
Alu_110-1	AluSx	AluS	12-E7	ENSG00000140548	ZNF710	ZF - C2H2	209.75	212.852	158.599	6.62777	4.96321
Alu_110-1	AluSx	AluS	12-F1	ENSG00000109381	ELF2	WH - ETS	195.25	199.336	148.528	5.27204	3.94797
Alu_110-1	AluSx	AluS	2-A11	ENSG00000178860	MSC	bHLH	198.5	192.851	148.88	5.35294	3.98365
Alu_110-1	AluSx	AluS	2-E12	ENSG00000105722	ERF	WH - ETS	207	192.525	148.629	5.3191	3.95847
Alu_110-1	AluSx	AluS	2-E6	ENSG00000154727	GABPA	WH - ETS	201.75	200.844	155.051	6.18352	4.60177
Alu_110-1	AluSx	AluS	2-H5	ENSG00000153786	ZDHHC7	ZF - DHHC	232	201.19	155.318	6.21952	4.62856
Alu_110-1	AluSx	AluS	4-F1	ENSG00000143171	RXRG	ZF - NHR	227	243.672	188.114	10.6342	7.914
Alu_110-1	AluSx	AluS	4-H7	ENSG00000124216	SNAI1	ZF - C2H2	241	192.074	148.28	5.27216	3.92354
Alu_110-1	AluSx	AluS	5-B2	ENSG00000111783	RFX4	WH - RFX	196.5	207.135	162.898	7.17983	5.81257
Alu_110-1	AluSx	AluS	6-A9	ENSG00000168875	SOX14	HMG	200.75	192.856	151.668	5.66817	4.58877
Alu_110-1	AluSx	AluS	6-G10	ENSG00000185670	ZBTB3	ZF - C2H2	209.25	212.06	166.771	7.70116	6.23462
Alu_110-1	AluSx	AluS	6-G4	ENSG00000111046	MYF6	bHLH	220.5	221.03	173.825	8.65073	7.00336
Alu_110-1	AluSx	AluS	7-B3	ENSG00000144852	NR1I2	ZF - NHR	189.25	196.618	154.627	6.06642	4.91118
Alu_110-1	AluSx	AluS	7-H9	ENSG00000140262	TCF12	bHLH	232	207.355	163.071	7.20313	5.83142
Alu_110-1	AluSx	AluS	8-A4	ENSG00000109787	KLF3	ZF - C2H2	176.25	173.621	136.541	3.63191	2.94028
Alu_110-1	AluSx	AluS	8-D12	ENSG00000196628	TCF4	bHLH	232.25	205.959	161.973	7.05535	5.71178
Alu_110-1	AluSx	AluS	8-E11	ENSG00000186908	ZDHHC17	ZF - DHHC	177.25	184.378	145.001	4.77061	3.86214
Alu_110-1	AluSx	AluS	8-G1	ENSG00000185551	NR2F2	ZF - NHR	246	232.458	182.813	9.86057	7.9828
Alu_110-1	AluSx	AluS	8-H3	ENSG00000152804	HHEX	HD	203.5	179.721	141.339	4.27768	3.46308
Alu_110-1	AluSx	AluS	8-H8	ENSG00000071564	TCF3	bHLH	226	201.241	158.263	6.55586	5.30742
Alu_110-1	AluSx	AluS	8-H9	ENSG00000185551	NR2F2	ZF - NHR	243.75	210.659	165.669	7.55288	6.11458
Alu_111-2	AluSc8	AluS	1-C5	ENSG00000164532	TBX20	T-BOX	226	234.145	262.552	20.6545	24.5024
Alu_111-2	AluSc8	AluS	12-E12	ENSG00000106006	HOXA6	HD - HOX	168.75	140.07	142.5	4.46059	4.38074
Alu_111-2	AluSc8	AluS	12-E7	ENSG00000140548	ZNF710	ZF - C2H2	146.75	156.225	158.935	6.67294	6.55349
Alu_111-2	AluSc8	AluS	12-F1	ENSG00000109381	ELF2	WH - ETS	151.75	142.669	145.144	4.81645	4.73023
Alu_111-2	AluSc8	AluS	2-E12	ENSG00000105722	ERF	WH - ETS	142.5	133.434	149.622	5.4528	6.46865
Alu_111-2	AluSc8	AluS	2-H5	ENSG00000153786	ZDHHC7	ZF - DHHC	139.25	129.93	145.693	4.92384	5.84115
Alu_111-2	AluSc8	AluS	4-B3	ENSG00000122145	TBX22	T-BOX	121	125.361	140.57	4.23425	5.02308
Alu_111-2	AluSc8	AluS	5-A1	ENSG00000162419	GMEB1	SAND	193.5	184.202	180.743	9.58199	10.2507
Alu_111-2	AluSc8	AluS	8-A4	ENSG00000109787	KLF3	ZF - C2H2	209	217.672	213.584	14.0028	14.98
Alu_112-3	AluSx1	AluS	1-C5	ENSG00000164532	TBX20	T-BOX	102.5	106.141	122.362	1.78322	2.07436
Alu_112-3	AluSx1	AluS	1-H5	ENSG00000151090	THRB	ZF - NHR	123.5	115.908	133.621	3.29885	3.83743
Alu_112-3	AluSx1	AluS	11-D7	ENSG00000156150	ALX3	HD	99.75	98.8681	113.494	0.555996	0.659577
Alu_112-3	AluSx1	AluS	12-C4	ENSG00000171443	ZNF524	HMG, ZF - C2H2	103.75	109.026	125.154	2.12559	2.52159
Alu_112-3	AluSx1	AluS	12-E12	ENSG00000106006	HOXA6	HD - HOX	111	102.886	118.106	1.17681	1.39605
Alu_112-3	AluSx1	AluS	12-E7	ENSG00000140548	ZNF710	ZF - C2H2	102	104.876	120.391	1.48445	1.761
Alu_112-3	AluSx1	AluS	12-F1	ENSG00000109381	ELF2	WH - ETS	118.25	114.686	131.652	3.00031	3.55926
Alu_112-3	AluSx1	AluS	2-E6	ENSG00000154727	GABPA	WH - ETS	103.5	106.559	122.843	1.84803	2.14974
Alu_112-3	AluSx1	AluS	4-D7	ENSG00000089225	TBX5	T-BOX	103	105.47	121.588	1.67907	1.9532
Alu_112-3	AluSx1	AluS	4-F1	ENSG00000143171	RXRG	ZF - NHR	113.75	111.797	128.882	2.66092	3.09535
Alu_112-3	AluSx1	AluS	8-A4	ENSG00000109787	KLF3	ZF - C2H2	122.5	124.671	147.864	5.15602	6.50288
Alu_112-3	AluSx1	AluS	8-G1	ENSG00000185551	NR2F2	ZF - NHR	118.25	113.984	135.188	3.44975	4.3509
Alu_112-3	AluSx1	AluS	8-H3	ENSG00000152804	HHEX	HD	111.75	103.863	123.184	1.83384	2.31289
Alu_112-3	AluSx1	AluS	8-H9	ENSG00000185551	NR2F2	ZF - NHR	118.5	111.968	132.797	3.12786	3.94493
Alu_133-1	AluYj4	AluY	8-H9	ENSG00000185551	NR2F2	ZF - NHR	218.25	184.534	138.574	3.90551	2.88854
Alu_133-1	AluYj4	AluY	1-A4	ENSG00000176842	IRX5	HD	193.5	191.359	152.831	5.88471	4.51976
Alu_133-1	AluYj4	AluY	1-C1	ENSG00000008441	NFIX	MH1	226.5	235.866	188.377	10.6696	8.19481
Alu_133-1	AluYj4	AluY	1-C5	ENSG00000164532	TBX20	T-BOX	236.75	239.658	191.405	11.0773	8.50791
Alu_133-1	AluYj4	AluY	1-D10	ENSG00000153779	TGIF2LX	HD	175	183.969	146.929	5.09021	3.90955
Alu_133-1	AluYj4	AluY	1-E3	ENSG00000134954	ETS1	WH - ETS	181.25	178.52	142.577	4.50441	3.45962
Alu_133-1	AluYj4	AluY	1-H12	ENSG00000147862	NFIB	MH1	214.75	191.144	152.659	5.86157	4.50199
Alu_133-1	AluYj4	AluY	1-H8	ENSG00000125618	PAX8	PD	228.25	208.687	166.67	7.74763	5.95058
Alu_133-1	AluYj4	AluY	11-D7	ENSG00000156150	ALX3	HD	185	213.987	160.518	6.88597	4.68779
Alu_133-1	AluYj4	AluY	11-E7	ENSG00000160113	NR2F6	ZF - NHR	216.75	222.872	167.183	7.78315	5.29856
Alu_133-1	AluYj4	AluY	12-E11	ENSG00000184302	SIX6	HD - SIX	190.75	190.346	142.784	4.49883	3.06269
Alu_133-1	AluYj4	AluY	12-E12	ENSG00000106006	HOXA6	HD - HOX	195	167.526	125.666	2.19452	1.49397
Alu_133-1	AluYj4	AluY	12-E2	ENSG00000066336	SPI1	WH - ETS	180.25	180.653	135.513	3.52008	2.39638
Alu_133-1	AluYj4	AluY	12-F9	ENSG00000197921	HES5	bHLH	191.25	208.793	156.622	6.36152	4.33076
Alu_133-1	AluYj4	AluY	2-C2	ENSG00000162599	NFIA	MH1	242.5	267.212	213.412	14.0396	10.7832
Alu_133-1	AluYj4	AluY	2-E6	ENSG00000154727	GABPA	WH - ETS	194.5	188.014	150.159	5.52504	4.24352
Alu_133-1	AluYj4	AluY	2-F8	ENSG00000154957	ZNF18	ZF - C2H2	231	214.322	171.17	8.35338	6.41583
Alu_133-1	AluYj4	AluY	2-H5	ENSG00000153786	ZDHHC7	ZF - DHHC	207.75	182.134	145.463	4.89295	3.75804
Alu_133-1	AluYj4	AluY	4-A5	ENSG00000102383	ZDHHC15	ZF - DHHC	183.333	191.115	152.636	5.85844	4.49958
Alu_133-1	AluYj4	AluY	4-B3	ENSG00000122145	TBX22	T-BOX	224.5	224.866	179.591	9.48697	7.28649
Alu_133-1	AluYj4	AluY	4-D7	ENSG00000089225	TBX5	T-BOX	207.75	214.27	171.129	8.34785	6.41158
Alu_133-1	AluYj4	AluY	4-F1	ENSG00000143171	RXRG	ZF - NHR	223.75	215.922	172.448	8.52543	6.54797
Alu_133-1	AluYj4	AluY	4-F12	ENSG00000196092	PAX5	PD	215.25	201.149	160.65	6.93724	5.32816
Alu_133-1	AluYj4	AluY	5-C4	ENSG00000012504	NR1H4	ZF - NHR	189	208.422	156.513	6.32034	4.67455
Alu_133-1	AluYj4	AluY	6-A9	ENSG00000168875	SOX14	HMG	193.25	174.535	131.066	2.89481	2.14102
Alu_133-1	AluYj4	AluY	6-E9	ENSG00000141905	NFIC	MH1	226.5	215.369	161.729	7.02253	5.1939
Alu_133-1	AluYj4	AluY	7-A8	ENSG00000087903	RFX2	WH - RFX	204.25	196.058	147.228	5.07047	3.75015
Alu_133-1	AluYj4	AluY	7-B3	ENSG00000144852	NR1I2	ZF - NHR	231.75	249.388	187.276	10.4613	7.73726
Alu_133-1	AluYj4	AluY	8-A4	ENSG00000109787	KLF3	ZF - C2H2	218.25	218.331	163.954	7.32197	5.41537
Alu_133-1	AluYj4	AluY	8-B10	ENSG00000112837	TBX18	T-BOX	184.25	192.718	144.72	4.73285	3.50044
Alu_133-1	AluYj4	AluY	8-E11	ENSG00000186908	ZDHHC17	ZF - DHHC	186.75	193.418	145.246	4.8036	3.55277
Alu_133-1	AluYj4	AluY	8-G1	ENSG00000185551	NR2F2	ZF - NHR	222.25	230.179	172.851	8.51962	6.30116
Alu_133-1	AluYj4	AluY	8-H3	ENSG00000152804	HHEX	HD	199	182.848	137.308	3.73517	2.76255
Alu_142-2	AluSx4	AluS	1-C5	ENSG00000164532	TBX20	T-BOX	228.75	231.838	161.322	7.02777	4.98249
Alu_142-2	AluSx4	AluS	1-H8	ENSG00000125618	PAX8	PD	233	217.392	151.27	5.6746	4.02313
Alu_142-2	AluSx4	AluS	12-A12	ENSG00000141052	MYOCD	RPEL	217	213.261	136.41	3.64074	2.24855
Alu_142-2	AluSx4	AluS	12-C4	ENSG00000171443	ZNF524	HMG, ZF - C2H2	213	225.901	144.494	4.72903	2.92069
Alu_142-2	AluSx4	AluS	12-E12	ENSG00000106006	HOXA6	HD - HOX	204.75	194.604	124.476	2.03429	1.25639
Alu_142-2	AluSx4	AluS	2-A12	ENSG00000173545	ZNF622	ZF - C2H2	221.75	187.99	130.811	2.92056	2.07059
Alu_142-2	AluSx4	AluS	2-D3	ENSG00000171425	ZNF581	ZF - C2H2	211.5	215.068	149.653	5.45692	3.8688
Alu_142-2	AluSx4	AluS	2-H5	ENSG00000153786	ZDHHC7	ZF - DHHC	227.75	203.484	141.592	4.37183	3.0995
Alu_142-2	AluSx4	AluS	4-A5	ENSG00000102383	ZDHHC15	ZF - DHHC	209.5	209.404	145.712	4.92641	3.49268
Alu_142-2	AluSx4	AluS	4-B3	ENSG00000122145	TBX22	T-BOX	198.25	195.856	136.284	3.65734	2.59295
Alu_142-2	AluSx4	AluS	4-F1	ENSG00000143171	RXRG	ZF - NHR	231.75	231.652	161.192	7.01029	4.97009
Alu_142-2	AluSx4	AluS	4-F12	ENSG00000196092	PAX5	PD	230.75	212.843	148.105	5.24851	3.72104
Alu_142-2	AluSx4	AluS	6-A9	ENSG00000168875	SOX14	HMG	203.5	199.915	129.803	2.72479	1.9092
Alu_142-2	AluSx4	AluS	6-C6	ENSG00000177108	ZDHHC22	ZF - DHHC	201.75	210.099	136.415	3.61487	2.53287
Alu_142-2	AluSx4	AluS	6-G10	ENSG00000185670	ZBTB3	ZF - C2H2	223.75	232.325	150.846	5.55747	3.894
Alu_142-2	AluSx4	AluS	6-H5	ENSG00000188818	ZDHHC11	ZF - DHHC	215.75	201.983	131.145	2.90553	2.03584
Alu_142-2	AluSx4	AluS	7-A8	ENSG00000087903	RFX2	WH - RFX	217	214.448	139.238	3.99494	2.79917
Alu_142-2	AluSx4	AluS	7-B3	ENSG00000144852	NR1I2	ZF - NHR	246	251.121	163.05	7.20023	5.04505
Alu_142-2	AluSx4	AluS	8-A4	ENSG00000109787	KLF3	ZF - C2H2	176.5	179.112	116.295	0.90649	0.635158
Alu_142-2	AluSx4	AluS	8-D12	ENSG00000196628	TCF4	bHLH	195.5	180.797	117.389	1.05382	0.738391
Alu_142-2	AluSx4	AluS	8-E11	ENSG00000186908	ZDHHC17	ZF - DHHC	217.25	226.578	147.114	5.05511	3.54201
Alu_142-2	AluSx4	AluS	8-G1	ENSG00000185551	NR2F2	ZF - NHR	220.75	212.53	137.993	3.82735	2.68174
Alu_142-2	AluSx4	AluS	8-H3	ENSG00000152804	HHEX	HD	214.75	196.296	127.453	2.40846	1.68756
Alu_142-2	AluSx4	AluS	8-H9	ENSG00000185551	NR2F2	ZF - NHR	225	200.988	130.499	2.81852	1.97488
Alu_142-2	AluSx4	AluS	9-B12	ENSG00000188706	ZDHHC9	ZF - DHHC	217.75	204.144	130.578	2.85577	1.76375
Alu_204-1	AluSc	AluS	1-A1	ENSG00000119715	ESRRB	ZF - NHR	199.5	219.089	166.094	7.67004	6.20942
Alu_204-1	AluSc	AluS	1-C5	ENSG00000164532	TBX20	T-BOX	203.25	214.48	162.599	7.19963	5.82859
Alu_204-1	AluSc	AluS	11-C7	ENSG00000175745	NR2F1	ZF - NHR	193	183.655	177.295	9.14443	9.44526
Alu_204-1	AluSc	AluS	11-E7	ENSG00000160113	NR2F6	ZF - NHR	192.5	166.619	160.849	6.93056	7.15855
Alu_204-1	AluSc	AluS	12-E7	ENSG00000140548	ZNF710	ZF - C2H2	155	142.764	137.82	3.8306	3.95661
Alu_204-1	AluSc	AluS	12-F1	ENSG00000109381	ELF2	WH - ETS	128	130.451	125.933	2.23054	2.30392
Alu_204-1	AluSc	AluS	2-D3	ENSG00000171425	ZNF581	ZF - C2H2	187	190.096	144.114	4.71127	3.81409
Alu_204-1	AluSc	AluS	2-E12	ENSG00000105722	ERF	WH - ETS	196.75	178.506	135.327	3.52852	2.85658
Alu_204-1	AluSc	AluS	2-E6	ENSG00000154727	GABPA	WH - ETS	182	174.944	132.627	3.16501	2.56229
Alu_204-1	AluSc	AluS	2-H5	ENSG00000153786	ZDHHC7	ZF - DHHC	227.75	193.373	146.598	5.04567	4.08481
Alu_204-1	AluSc	AluS	4-B8	ENSG00000196482	ESRRG	ZF - NHR	207.25	214.223	162.404	7.17344	5.80739
Alu_204-1	AluSc	AluS	4-F1	ENSG00000143171	RXRG	ZF - NHR	228.25	235.794	178.757	9.37475	7.5895
Alu_204-1	AluSc	AluS	4-H7	ENSG00000124216	SNAI1	ZF - C2H2	230.75	185.19	140.394	4.21058	3.40875
Alu_204-1	AluSc	AluS	5-B2	ENSG00000111783	RFX4	WH - RFX	162	180.328	161.012	6.92591	6.69222
Alu_204-1	AluSc	AluS	7-B3	ENSG00000144852	NR1I2	ZF - NHR	177.25	198.252	177.016	9.08028	8.7739
Alu_204-1	AluSc	AluS	8-G1	ENSG00000185551	NR2F2	ZF - NHR	228.5	213.968	191.049	10.9692	10.5991
Alu_204-1	AluSc	AluS	8-H9	ENSG00000185551	NR2F2	ZF - NHR	229.75	206.14	184.059	10.0284	9.69
Alu_205-1	AluSc	AluS	1-A4	ENSG00000176842	IRX5	HD	188.25	181.294	176.793	9.11031	8.39663
Alu_205-1	AluSc	AluS	1-C5	ENSG00000164532	TBX20	T-BOX	178	190.048	185.33	10.2594	9.45573
Alu_205-1	AluSc	AluS	1-F12	ENSG00000023041	ZDHHC6	ZF - DHHC	155.5	146.791	143.147	4.58114	4.22226
Alu_205-1	AluSc	AluS	1-G12	ENSG00000177463	NR2C2	ZF - NHR	149.5	136.317	132.933	3.20627	2.9551
Alu_205-1	AluSc	AluS	1-H8	ENSG00000125618	PAX8	PD	178.25	164.078	160.005	6.85047	6.31382
Alu_205-1	AluSc	AluS	11-D7	ENSG00000156150	ALX3	HD	159.5	177.65	176.748	9.07084	8.29643
Alu_205-1	AluSc	AluS	12-A12	ENSG00000141052	MYOCD	RPEL	155	148.827	148.072	5.21058	4.76574
Alu_205-1	AluSc	AluS	12-E12	ENSG00000106006	HOXA6	HD - HOX	177.5	163.297	162.469	7.1486	6.5383
Alu_205-1	AluSc	AluS	12-E2	ENSG00000066336	SPI1	WH - ETS	146.25	149.594	148.835	5.31333	4.85971
Alu_205-1	AluSc	AluS	12-E7	ENSG00000140548	ZNF710	ZF - C2H2	159.75	171.74	170.868	8.27931	7.57248
Alu_205-1	AluSc	AluS	12-F1	ENSG00000109381	ELF2	WH - ETS	164.75	164.428	163.594	7.30004	6.67681
Alu_205-1	AluSc	AluS	2-A12	ENSG00000173545	ZNF622	ZF - C2H2	168.25	129.78	126.558	2.3481	2.16415
Alu_205-1	AluSc	AluS	2-E10	ENSG00000175893	ZDHHC21	ZF - DHHC	144.25	143.807	140.237	4.18943	3.86124
Alu_205-1	AluSc	AluS	2-E12	ENSG00000105722	ERF	WH - ETS	173	148.019	144.344	4.74231	4.3708
Alu_205-1	AluSc	AluS	2-E6	ENSG00000154727	GABPA	WH - ETS	144.75	146.312	142.68	4.51828	4.16432
Alu_205-1	AluSc	AluS	2-H5	ENSG00000153786	ZDHHC7	ZF - DHHC	206.25	184.256	179.682	9.49915	8.75501
Alu_205-1	AluSc	AluS	3-B6	ENSG00000156599	ZDHHC5	ZF - DHHC	152.75	156.465	152.58	5.85101	5.39265
Alu_205-1	AluSc	AluS	3-B9	ENSG00000160446	ZDHHC12	ZF - DHHC	137.25	142.969	139.42	4.07948	3.7599
Alu_205-1	AluSc	AluS	4-A5	ENSG00000102383	ZDHHC15	ZF - DHHC	155	148.055	144.379	4.74704	4.37516
Alu_205-1	AluSc	AluS	4-D3	ENSG00000125945	ZNF436	ZF - C2H2	186	195.977	191.111	11.0377	10.1731
Alu_205-1	AluSc	AluS	4-F1	ENSG00000143171	RXRG	ZF - NHR	165.75	159.632	155.669	6.26675	5.77582
Alu_205-1	AluSc	AluS	4-H7	ENSG00000124216	SNAI1	ZF - C2H2	191.75	151.644	147.879	5.21815	4.80937
Alu_205-1	AluSc	AluS	6-A9	ENSG00000168875	SOX14	HMG	154	152.356	147.11	5.05458	5.08924
Alu_205-1	AluSc	AluS	7-A8	ENSG00000087903	RFX2	WH - RFX	149.75	154.202	148.892	5.29447	5.33078
Alu_205-1	AluSc	AluS	7-B3	ENSG00000144852	NR1I2	ZF - NHR	140.5	148.115	143.015	4.50337	4.53426
Alu_205-1	AluSc	AluS	7-H9	ENSG00000140262	TCF12	bHLH	162.5	141.804	136.921	3.68299	3.70825
Alu_205-1	AluSc	AluS	8-A7	ENSG00000135164	DMTF1	MYB	173.25	175.35	169.312	8.04325	8.09841
Alu_205-1	AluSc	AluS	8-D12	ENSG00000196628	TCF4	bHLH	160	151.154	145.949	4.89831	4.93191
Alu_205-1	AluSc	AluS	8-E11	ENSG00000186908	ZDHHC17	ZF - DHHC	159	162.881	157.272	6.42249	6.46653
Alu_205-1	AluSc	AluS	8-G1	ENSG00000185551	NR2F2	ZF - NHR	151	138.436	133.669	3.24528	3.26753
Alu_205-1	AluSc	AluS	8-H9	ENSG00000185551	NR2F2	ZF - NHR	165.25	143.732	138.783	3.93363	3.96061
Alu_205-1	AluSc	AluS	9-B12	ENSG00000188706	ZDHHC9	ZF - DHHC	166.5	159.06	158.253	6.58114	6.01928
Alu_207-1	AluSg	AluS	1-A4	ENSG00000176842	IRX5	HD	143.5	133.103	147.957	5.22869	5.4007
Alu_207-1	AluSg	AluS	1-C5	ENSG00000164532	TBX20	T-BOX	184	197.549	219.595	14.872	15.3612
Alu_207-1	AluSg	AluS	1-H5	ENSG00000151090	THRB	ZF - NHR	152.75	149.763	166.477	7.72162	7.97564
Alu_207-1	AluSg	AluS	11-D7	ENSG00000156150	ALX3	HD	149.75	166.497	175.767	8.93874	8.43311
Alu_207-1	AluSg	AluS	12-C4	ENSG00000171443	ZNF524	HMG, ZF - C2H2	157.5	174.289	183.993	10.046	9.47773
Alu_207-1	AluSg	AluS	12-C7	ENSG00000156925	ZIC3	ZF - C2H2	140.5	154.571	163.177	7.244	6.83423
Alu_207-1	AluSg	AluS	12-C9	ENSG00000152977	ZIC1	ZF - C2H2	142.5	153.744	162.303	7.12637	6.72326
Alu_207-1	AluSg	AluS	12-E11	ENSG00000184302	SIX6	HD - SIX	148.25	149.704	158.039	6.55234	6.1817
Alu_207-1	AluSg	AluS	12-E12	ENSG00000106006	HOXA6	HD - HOX	159.75	135.079	142.6	4.47401	4.22093
Alu_207-1	AluSg	AluS	12-E2	ENSG00000066336	SPI1	WH - ETS	146	143.669	151.668	5.69474	5.37261
Alu_207-1	AluSg	AluS	12-E7	ENSG00000140548	ZNF710	ZF - C2H2	162.25	167.945	177.296	9.14449	8.62722
Alu_207-1	AluSg	AluS	12-F1	ENSG00000109381	ELF2	WH - ETS	153.75	149.037	157.335	6.45754	6.09226
Alu_207-1	AluSg	AluS	2-E12	ENSG00000105722	ERF	WH - ETS	156	141.06	156.802	6.4193	6.63048
Alu_207-1	AluSg	AluS	2-E6	ENSG00000154727	GABPA	WH - ETS	148.5	153.593	170.734	8.29471	8.56758
Alu_207-1	AluSg	AluS	2-H5	ENSG00000153786	ZDHHC7	ZF - DHHC	196.75	186.857	207.711	13.2722	13.7088
Alu_207-1	AluSg	AluS	3-A1	ENSG00000126767	ELK1	WH - ETS	136.25	128.776	143.147	4.5812	4.73191
Alu_207-1	AluSg	AluS	4-B3	ENSG00000122145	TBX22	T-BOX	134.75	145.815	162.088	7.13082	7.36541
Alu_207-1	AluSg	AluS	5-B2	ENSG00000111783	RFX4	WH - RFX	133.25	149.314	158.982	6.65273	6.93134
Alu_207-1	AluSg	AluS	6-A9	ENSG00000168875	SOX14	HMG	140.25	131.625	140.148	4.11746	4.28989
Alu_207-1	AluSg	AluS	8-A4	ENSG00000109787	KLF3	ZF - C2H2	149.25	161.263	171.706	8.36543	8.71577
Alu_22-1	AluYm1	AluY	9-B12	ENSG00000188706	ZDHHC9	ZF - DHHC	219.75	211.141	144.228	4.69324	3.3078
Alu_22-1	AluYm1	AluY	1-C5	ENSG00000164532	TBX20	T-BOX	232.75	248.621	167.623	7.87592	5.55095
Alu_22-1	AluYm1	AluY	1-F12	ENSG00000023041	ZDHHC6	ZF - DHHC	215.75	200.061	134.883	3.46877	2.44479
Alu_22-1	AluYm1	AluY	1-G12	ENSG00000177463	NR2C2	ZF - NHR	232	210.717	142.068	4.43587	3.12641
Alu_22-1	AluYm1	AluY	1-G4	ENSG00000117036	ETV3	WH - ETS	205	213.798	144.145	4.7155	3.32349
Alu_22-1	AluYm1	AluY	11-C7	ENSG00000175745	NR2F1	ZF - NHR	190.75	197.691	135.041	3.45652	2.43616
Alu_22-1	AluYm1	AluY	11-E7	ENSG00000160113	NR2F6	ZF - NHR	237	237.869	162.486	7.15096	5.04
Alu_22-1	AluYm1	AluY	12-A12	ENSG00000141052	MYOCD	RPEL	210.5	203.746	139.177	4.01328	2.82857
Alu_22-1	AluYm1	AluY	2-E10	ENSG00000175893	ZDHHC21	ZF - DHHC	212	197.448	133.122	3.23161	2.27764
Alu_22-1	AluYm1	AluY	2-H5	ENSG00000153786	ZDHHC7	ZF - DHHC	235.5	220.218	148.473	5.29812	3.73412
Alu_22-1	AluYm1	AluY	3-B6	ENSG00000156599	ZDHHC5	ZF - DHHC	210.25	210.662	142.03	4.43085	3.12287
Alu_22-1	AluYm1	AluY	3-B8	ENSG00000186350	RXRA	ZF - NHR	221.25	222.245	149.84	5.48209	3.86378
Alu_22-1	AluYm1	AluY	4-A5	ENSG00000102383	ZDHHC15	ZF - DHHC	217.25	233.354	157.33	6.49035	4.5744
Alu_22-1	AluYm1	AluY	4-B3	ENSG00000122145	TBX22	T-BOX	234.75	244.628	164.931	7.51348	5.2955
Alu_22-1	AluYm1	AluY	4-D7	ENSG00000089225	TBX5	T-BOX	211	217.696	146.773	5.06923	3.57279
Alu_22-1	AluYm1	AluY	4-F1	ENSG00000143171	RXRG	ZF - NHR	237	236.945	159.751	6.81624	4.80409
Alu_22-1	AluYm1	AluY	6-C6	ENSG00000177108	ZDHHC22	ZF - DHHC	208.25	210.53	137.719	3.7904	2.61006
Alu_22-1	AluYm1	AluY	6-H5	ENSG00000188818	ZDHHC11	ZF - DHHC	219.75	214.976	140.628	4.18197	2.8797
Alu_22-1	AluYm1	AluY	7-A8	ENSG00000087903	RFX2	WH - RFX	209.5	214.311	140.192	4.12335	2.83933
Alu_22-1	AluYm1	AluY	8-A4	ENSG00000109787	KLF3	ZF - C2H2	237.75	247.61	161.975	7.05557	4.85845
Alu_22-1	AluYm1	AluY	8-D4	ENSG00000105866	SP4	ZF - C2H2	224.25	223.936	146.489	4.97092	3.42297
Alu_22-1	AluYm1	AluY	8-E11	ENSG00000186908	ZDHHC17	ZF - DHHC	222.5	214.72	140.46	4.15939	2.86415
Alu_22-1	AluYm1	AluY	8-G1	ENSG00000185551	NR2F2	ZF - NHR	239.25	248.695	162.685	7.15111	4.92424
Alu_22-1	AluYm1	AluY	8-H9	ENSG00000185551	NR2F2	ZF - NHR	239.75	219.718	143.73	4.59953	3.16723
Alu_33-2	AluSc	AluS	1-A1	ENSG00000119715	ESRRB	ZF - NHR	234.5	236.79	175.917	8.99233	7.08833
Alu_33-2	AluSc	AluS	1-C5	ENSG00000164532	TBX20	T-BOX	225.75	228.304	169.612	8.14371	6.41939
Alu_33-2	AluSc	AluS	11-C7	ENSG00000175745	NR2F1	ZF - NHR	200.75	202.881	146.418	4.98805	3.45462
Alu_33-2	AluSc	AluS	11-E7	ENSG00000160113	NR2F6	ZF - NHR	230.75	231.65	167.181	7.78294	5.3903
Alu_33-2	AluSc	AluS	2-H5	ENSG00000153786	ZDHHC7	ZF - DHHC	223.25	205.734	152.844	5.8865	4.64012
Alu_33-2	AluSc	AluS	4-B8	ENSG00000196482	ESRRG	ZF - NHR	230	226.516	168.284	7.96491	6.27845
Alu_33-2	AluSc	AluS	4-F1	ENSG00000143171	RXRG	ZF - NHR	221.75	229.626	170.594	8.27589	6.52358
Alu_33-2	AluSc	AluS	5-B2	ENSG00000111783	RFX4	WH - RFX	219.25	239.2	171.613	8.35302	6.25516
Alu_33-2	AluSc	AluS	6-H5	ENSG00000188818	ZDHHC11	ZF - DHHC	198	196.512	140.987	4.23034	3.16789
Alu_33-2	AluSc	AluS	8-E11	ENSG00000186908	ZDHHC17	ZF - DHHC	193.75	196.718	141.135	4.25026	3.18281
Alu_33-2	AluSc	AluS	8-G1	ENSG00000185551	NR2F2	ZF - NHR	235.25	240.416	172.486	8.47045	6.3431
Alu_33-2	AluSc	AluS	8-H9	ENSG00000185551	NR2F2	ZF - NHR	238.5	222.244	159.449	6.71549	5.0289
Alu_4-1	AluY	AluY	9-B12	ENSG00000188706	ZDHHC9	ZF - DHHC	160.25	136.075	140.21	4.1523	3.9801
Alu_4-1	AluY	AluY	1-C5	ENSG00000164532	TBX20	T-BOX	182.25	182.817	181.728	9.77464	8.87242
Alu_4-1	AluY	AluY	1-F12	ENSG00000023041	ZDHHC6	ZF - DHHC	153.5	137.459	136.64	3.70526	3.36326
Alu_4-1	AluY	AluY	1-G4	ENSG00000117036	ETV3	WH - ETS	154.5	147.31	146.433	5.02348	4.5598
Alu_4-1	AluY	AluY	12-E11	ENSG00000184302	SIX6	HD - SIX	151.75	147.265	151.74	5.70437	5.46781
Alu_4-1	AluY	AluY	12-E12	ENSG00000106006	HOXA6	HD - HOX	166.25	141.376	145.672	4.88756	4.68487
Alu_4-1	AluY	AluY	12-E7	ENSG00000140548	ZNF710	ZF - C2H2	157.5	156.141	160.886	6.93554	6.64791
Alu_4-1	AluY	AluY	12-F1	ENSG00000109381	ELF2	WH - ETS	151	157.509	162.295	7.12525	6.82975
Alu_4-1	AluY	AluY	2-A12	ENSG00000173545	ZNF622	ZF - C2H2	172	136.043	135.233	3.51579	3.19128
Alu_4-1	AluY	AluY	2-E12	ENSG00000105722	ERF	WH - ETS	182.25	163.322	162.349	7.16596	6.50452
Alu_4-1	AluY	AluY	2-E6	ENSG00000154727	GABPA	WH - ETS	166.75	162.804	161.835	7.09675	6.44171
Alu_4-1	AluY	AluY	2-H5	ENSG00000153786	ZDHHC7	ZF - DHHC	208.75	181.039	179.961	9.53672	8.65646
Alu_4-1	AluY	AluY	3-B6	ENSG00000156599	ZDHHC5	ZF - DHHC	165	155.105	154.182	6.06655	5.5066
Alu_4-1	AluY	AluY	6-A9	ENSG00000168875	SOX14	HMG	169.5	152.249	140.474	4.16127	3.69324
Alu_4-1	AluY	AluY	7-A2	ENSG00000141646	SMAD4	MH1	166.5	190.59	175.849	8.92318	7.91956
Alu_4-1	AluY	AluY	8-G1	ENSG00000185551	NR2F2	ZF - NHR	172	166.345	153.479	5.91189	5.24696
Alu_4-1	AluY	AluY	8-H3	ENSG00000152804	HHEX	HD	181	160.985	148.533	5.24619	4.65613
Alu_4-1	AluY	AluY	8-H9	ENSG00000185551	NR2F2	ZF - NHR	178.5	155.525	143.496	4.56811	4.05432
Alu_6-2	AluSg4	AluS	1-G12	ENSG00000177463	NR2C2	ZF - NHR	195.75	176.73	178.088	9.28468	10.206
Alu_6-2	AluSg4	AluS	11-C7	ENSG00000175745	NR2F1	ZF - NHR	234.5	230.708	220.974	15.0241	14.6352
Alu_6-2	AluSg4	AluS	11-E7	ENSG00000160113	NR2F6	ZF - NHR	240.75	225.709	216.185	14.3795	14.0073
Alu_6-2	AluSg4	AluS	12-E7	ENSG00000140548	ZNF710	ZF - C2H2	156.25	153.255	146.788	5.03787	4.90746
Alu_6-2	AluSg4	AluS	12-F1	ENSG00000109381	ELF2	WH - ETS	135.25	140.439	134.514	3.38554	3.29791
Alu_6-2	AluSg4	AluS	2-H5	ENSG00000153786	ZDHHC7	ZF - DHHC	174.75	158.147	159.363	6.76403	7.43522
Alu_6-2	AluSg4	AluS	4-F1	ENSG00000143171	RXRG	ZF - NHR	224.5	216.893	218.56	14.7326	16.1945
Alu_6-2	AluSg4	AluS	5-A10	ENSG00000169635	HIC2	ZF - C2H2	166.5	152.58	144.27	4.67233	4.30631
Alu_6-2	AluSg4	AluS	5-A4	ENSG00000164600	NEUROD6	bHLH	249.5	235.404	222.584	15.2143	14.0225
Alu_6-2	AluSg4	AluS	6-G10	ENSG00000185670	ZBTB3	ZF - C2H2	222	221.534	209.47	13.449	12.3954
Alu_6-2	AluSg4	AluS	6-G7	ENSG00000168826	ZBTB49	ZF - C2H2	147	145.357	137.441	3.75297	3.45897
Alu_72-1	AluYa5	AluY	9-B12	ENSG00000188706	ZDHHC9	ZF - DHHC	215	211.603	167.719	7.8554	6.15165
Alu_72-1	AluYa5	AluY	1-C5	ENSG00000164532	TBX20	T-BOX	202.25	207.624	164.204	7.41561	5.96315
Alu_72-1	AluYa5	AluY	1-F12	ENSG00000023041	ZDHHC6	ZF - DHHC	172.75	169.176	133.797	3.3225	2.67174
Alu_72-1	AluYa5	AluY	2-H5	ENSG00000153786	ZDHHC7	ZF - DHHC	224	209.51	165.695	7.6164	6.12461
Alu_72-1	AluYa5	AluY	3-B6	ENSG00000156599	ZDHHC5	ZF - DHHC	170.75	175.9	139.115	4.03835	3.24738
Alu_72-1	AluYa5	AluY	4-A5	ENSG00000102383	ZDHHC15	ZF - DHHC	181.25	179.468	141.936	4.41817	3.5528
Alu_72-1	AluYa5	AluY	4-F1	ENSG00000143171	RXRG	ZF - NHR	186	178.5	141.17	4.31508	3.4699
Alu_72-1	AluYa5	AluY	6-G10	ENSG00000185670	ZBTB3	ZF - C2H2	179.75	180.676	135.338	3.46988	2.7173
Alu_72-1	AluYa5	AluY	6-H5	ENSG00000188818	ZDHHC11	ZF - DHHC	210	200.776	150.394	5.4966	4.30445
Alu_72-1	AluYa5	AluY	7-A8	ENSG00000087903	RFX2	WH - RFX	187.25	191.151	143.184	4.52611	3.54445
Alu_72-1	AluYa5	AluY	8-A4	ENSG00000109787	KLF3	ZF - C2H2	178	185.34	138.831	3.94013	3.08556
Alu_72-1	AluYa5	AluY	8-E11	ENSG00000186908	ZDHHC17	ZF - DHHC	198.25	200.709	150.343	5.4898	4.29913
Alu_72-1	AluYa5	AluY	8-G1	ENSG00000185551	NR2F2	ZF - NHR	184.25	179.692	134.601	3.37067	2.63961
Alu_72-1	AluYa5	AluY	8-H9	ENSG00000185551	NR2F2	ZF - NHR	184	172.141	128.944	2.60926	2.04334
Alu_74-1	AluSq	AluS	1-E6	ENSG00000172819	RARG	ZF - NHR	147.75	150.011	175.285	8.90736	11.2342
Alu_74-1	AluSq	AluS	1-G12	ENSG00000177463	NR2C2	ZF - NHR	173.25	163.737	191.324	11.0663	13.9571
Alu_74-1	AluSq	AluS	11-C7	ENSG00000175745	NR2F1	ZF - NHR	169	171.531	200.839	12.3137	15.8642
Alu_74-1	AluSq	AluS	11-E7	ENSG00000160113	NR2F6	ZF - NHR	237	229.221	268.385	21.4062	27.5786
Alu_74-1	AluSq	AluS	12-C7	ENSG00000156925	ZIC3	ZF - C2H2	107.5	108.446	126.975	2.37075	3.05434
Alu_74-1	AluSq	AluS	12-C9	ENSG00000152977	ZIC1	ZF - C2H2	104.75	108.502	127.041	2.3796	3.06574
Alu_74-1	AluSq	AluS	4-F1	ENSG00000143171	RXRG	ZF - NHR	231.75	219.914	256.965	19.9025	25.1014
Alu_74-1	AluSq	AluS	6-G10	ENSG00000185670	ZBTB3	ZF - C2H2	235.5	221.395	271.857	21.847	30.0876
Alu_74-1	AluSq	AluS	7-B3	ENSG00000144852	NR1I2	ZF - NHR	155	168.826	207.306	13.1577	18.1207
Alu_74-1	AluSq	AluS	8-A4	ENSG00000109787	KLF3	ZF - C2H2	168	178.767	219.513	14.8009	20.3838
Alu_74-1	AluSq	AluS	8-G1	ENSG00000185551	NR2F2	ZF - NHR	233.75	221.326	271.772	21.8356	30.0719
Alu_74-1	AluSq	AluS	8-H3	ENSG00000152804	HHEX	HD	119.5	104.291	128.062	2.49044	3.42982
Alu_74-1	AluSq	AluS	8-H9	ENSG00000185551	NR2F2	ZF - NHR	233	202.284	248.391	18.6882	25.7373
Alu_78-2	AluSg	AluS	4-F1	ENSG00000143171	RXRG	ZF - NHR	140.75	138.125	160.069	6.85899	8.5606
Alu_78-2	AluSg	AluS	8-A4	ENSG00000109787	KLF3	ZF - C2H2	143.75	150.845	178.113	9.22792	11.7623
Alu_78-2	AluSg	AluS	8-G1	ENSG00000185551	NR2F2	ZF - NHR	151	146.919	173.477	8.60393	10.9669
Alu_78-2	AluSg	AluS	8-H9	ENSG00000185551	NR2F2	ZF - NHR	147	138.028	162.979	7.19073	9.16559
Alu_87-1	AluSg	AluS	8-H9	ENSG00000185551	NR2F2	ZF - NHR	173.5	156.157	154.173	6.00539	5.89789
Alu_87-1	AluSg	AluS	12-E12	ENSG00000106006	HOXA6	HD - HOX	129.5	123.941	130.464	2.84041	2.95936
Alu_87-1	AluSg	AluS	2-E12	ENSG00000105722	ERF	WH - ETS	163.25	143.545	129.314	2.71911	2.10189
Alu_87-1	AluSg	AluS	2-E6	ENSG00000154727	GABPA	WH - ETS	158.25	161.609	145.588	4.90978	3.7953
Alu_87-1	AluSg	AluS	2-H5	ENSG00000153786	ZDHHC7	ZF - DHHC	182	172.503	155.402	6.23085	4.81649
Alu_87-1	AluSg	AluS	3-B6	ENSG00000156599	ZDHHC5	ZF - DHHC	157.75	150.237	135.343	3.53067	2.72923
Alu_87-1	AluSg	AluS	4-A5	ENSG00000102383	ZDHHC15	ZF - DHHC	179	159.04	143.274	4.59823	3.55446
Alu_87-1	AluSg	AluS	4-F1	ENSG00000143171	RXRG	ZF - NHR	164	169.116	152.35	5.82003	4.49892
Alu_87-1	AluSg	AluS	6-A9	ENSG00000168875	SOX14	HMG	161.75	154.806	152.84	5.82594	5.72165
Alu_87-1	AluSg	AluS	6-H5	ENSG00000188818	ZDHHC11	ZF - DHHC	138.75	131.402	129.733	2.71543	2.66682
Alu_87-1	AluSg	AluS	7-A8	ENSG00000087903	RFX2	WH - RFX	163.75	162.041	159.983	6.78744	6.66594
Alu_87-1	AluSg	AluS	8-A4	ENSG00000109787	KLF3	ZF - C2H2	114.5	113.836	112.39	0.380838	0.374021
Alu_87-1	AluSg	AluS	8-E11	ENSG00000186908	ZDHHC17	ZF - DHHC	151	164.449	162.36	7.10746	6.98023
Alu_87-1	AluSg	AluS	8-G1	ENSG00000185551	NR2F2	ZF - NHR	169.25	151.98	150.05	5.45028	5.35272
Alu_87-1	AluSg	AluS	8-H3	ENSG00000152804	HHEX	HD	164	140.892	139.103	3.97671	3.90552
Alu_92-1	AluJb	AluJ	1-H5	ENSG00000151090	THRB	ZF - NHR	122.5	117.544	132.519	3.15046	3.70074
Alu_92-1	AluJb	AluJ	11-D7	ENSG00000156150	ALX3	HD	136.75	139.074	146.528	5.00281	5.35194
Alu_92-1	AluJb	AluJ	12-C7	ENSG00000156925	ZIC3	ZF - C2H2	127	131.051	138.075	3.86487	4.13458
Alu_92-1	AluJb	AluJ	12-D11	ENSG00000136826	KLF4	ZF - C2H2	122.75	127.249	134.069	3.32563	3.55771
Alu_92-1	AluJb	AluJ	12-E11	ENSG00000184302	SIX6	HD - SIX	128.75	130.31	137.294	3.7598	4.02218
Alu_92-1	AluJb	AluJ	12-E12	ENSG00000106006	HOXA6	HD - HOX	138.25	132.79	139.907	4.11152	4.39844
Alu_92-1	AluJb	AluJ	12-E2	ENSG00000066336	SPI1	WH - ETS	126.25	122.978	129.569	2.71999	2.90981
Alu_92-1	AluJb	AluJ	12-E7	ENSG00000140548	ZNF710	ZF - C2H2	130.5	130.205	137.183	3.7449	4.00624
Alu_92-1	AluJb	AluJ	12-F1	ENSG00000109381	ELF2	WH - ETS	133.25	132.281	139.371	4.03933	4.32122
Alu_92-1	AluJb	AluJ	12-F3	ENSG00000137270	GCM1	GCM	122.5	122.801	129.382	2.69477	2.88282
Alu_92-1	AluJb	AluJ	2-E12	ENSG00000105722	ERF	WH - ETS	119	114.658	129.265	2.71246	3.18624
Alu_92-1	AluJb	AluJ	2-E6	ENSG00000154727	GABPA	WH - ETS	109.5	110.508	124.587	2.08276	2.44656
Alu_92-1	AluJb	AluJ	5-B2	ENSG00000111783	RFX4	WH - RFX	139	148.078	181.511	9.68537	12.7523
Alu_92-1	AluJb	AluJ	6-G10	ENSG00000185670	ZBTB3	ZF - C2H2	123.5	120.899	148.196	5.20076	6.84764
Alu_92-1	AluJb	AluJ	8-A4	ENSG00000109787	KLF3	ZF - C2H2	131	135.61	166.229	7.62817	10.0437
Supplemental Table S2B: Protein-DNA interactions detected with Alu sequences. The bait ID and Alu family are indicated. The TF-prey array coordinates, ENSEMBL ID, official name and TF family are indicated. The raw and normalized interaction intensities scores are indicated.

## Sheet: Alphoid DNA
Bait ID	Prey Array Coordinate	TF Ensembl ID	TF name	TF family
Alph1	No PDIs
Alph2	12-F8	ENSG00000147180	ZNF711	ZF - C2H2
Alph2	5-A1	ENSG00000162419	GMEB1	SAND
Alph4	No PDIs
Alph7	No PDIs
Alph8	No PDIs
Alph11	12-F8	ENSG00000147180	ZNF711	ZF - C2H2
Alph11	12-E7	ENSG00000140548	ZNF710	ZF - C2H2
Alph11	10-E9	ENSG00000067646	ZFY	ZF - C2H2
Alph11	5-A1	ENSG00000162419	GMEB1	SAND
Alph13	12-E7	ENSG00000140548	ZNF710	ZF - C2H2
Alph13	5-A1	ENSG00000162419	GMEB1	SAND
Alph22	1-C1	ENSG00000008441	NFIX	MH1
Alph22	1-A11	ENSG00000123407	HOXC12	HD
Alph22	5-A1	ENSG00000162419	GMEB1	SAND
Alph23	5-A1	ENSG00000162419	GMEB1	SAND
Alph23	12-F1	ENSG00000109381	ELF2	WH - ETS
Alph30	1-B6	ENSG00000160973	FOXH1	WH - FH
Alph30	8-A4	ENSG00000109787	KLF3	ZF - C2H2
Supplemental Table S2B: Protein-DNA interactions detected with alphoid DNA sequences. The bait ID, the TF-prey array coordinates, ENSEMBL ID, official name and TF family are indicated.
