# Supplementary material for: Discovering human transcription factor physical interactions with genetic variants, novel DNA motifs, and repetitive elements using enhanced yeast one-hybrid assays
Source: HighWire-hosted journal article supplement (doi:10.1101/gr.248823.119), 2019-09-01
Supplement: Supplemental_Table_S4.xlsx [file Supplemental_Table_S4.xlsx]

## Sheet: UW.Motif.0118
GO biological process complete	Number of genes in term	Number of genes in set	expected	Fold Enrichment	+/-	raw P value	FDR	GATA4	GATA5
response to oleic acid	6	3	0.09	32.17	+	0.000279	0.0447	11038368	NF
regulation of prostatic bud formation	6	3	0.09	32.17	+	0.000279	0.0443	NF	NF
postsynaptic density organization	17	6	0.26	22.71	+	9.94e-07	0.0012	NF	NF
smooth muscle tissue development	20	5	0.31	16.09	+	3.36e-05	0.0129	16847256	9119112
regulation of retinoic acid receptor signaling pathway	16	4	0.25	16.09	+	0.000215	0.038	10677255	16162334
pulmonary valve development	19	5	0.3	16.93	+	2.72e-05	0.011	24513334	24796370
cortical actin cytoskeleton organization	40	6	0.62	9.65	+	6.86e-05	0.0183	30074440	8631498
sprouting angiogenesis	55	6	0.85	7.02	+	0.000336	0.0498	17975662
actomyosin structure organization	102	11	1.59	6.94	+	1.32e-06	0.00139	30074440	8631498
cardiocyte differentiation	117	10	1.82	5.5	+	2.64e-05	0.0112	27984724	17950269
cardiac muscle tissue development	160	12	2.49	4.83	+	1.43e-05	0.00778	27984724	17950269
positive regulation of Wnt signaling pathway	127	9	1.97	4.56	+	0.000252	0.0417	27066525	23903195
regulation of protein localization to membrane	181	12	2.81	4.27	+	4.49e-05	0.0144	NA	NA
positive regulation of cellular protein localization	324	19	5.04	3.77	+	1.6e-06	0.00157	NA	NA
learning or memory	253	14	3.93	3.56	+	6.89e-05	0.0181	NF	NF
urogenital system development	304	16	4.72	3.39	+	3.75e-05	0.0128	23874227	28180938
regulation of cellular response to growth factor stimulus	258	13	4.01	3.24	+	0.000298	0.0459	22809789	12944489
positive regulation of neuron differentiation	355	17	5.52	3.08	+	6.63e-05	0.0186	19543315	NF
regulation of developmental growth	322	15	5	3	+	0.000235	0.0402	19889636	19889636
developmental growth	370	17	5.75	2.96	+	0.000107	0.0228	19889636	19889636
forebrain development	378	17	5.87	2.89	+	0.000137	0.0263	9722184	NF
cellular response to organic cyclic compound	518	22	8.05	2.73	+	3.34e-05	0.0132	NA	NA
response to inorganic substance	532	22	8.27	2.66	+	4.89e-05	0.0148	NA	NA
cellular response to organonitrogen compound	506	20	7.86	2.54	+	0.000192	0.0347	NA	NA
response to hormone	889	30	13.82	2.17	+	9.27e-05	0.0208	25933105	24316148
cellular lipid metabolic process	993	31	15.43	2.01	+	0.000333	0.0499	25504870	NF
Supplemental Table S4A: Gene Ontology terms associated with genes that contain more than one copy of UW.Motif.0118 in their promoters. The number of genes in the term, the number of genes in the set that belong to the indicated term, the expected number of genes in the set belonging to the indicated term, the fold enrichment, and direction of enrichment are indicated. The raw p-values and the FDR…

## Sheet: UW.Motif.0167
GO biological process complete	Number of genes in term	Number of genes in set	expected	Fold Enrichment	+/-	raw P value	FDR	SOX2	SOX5	SOX7	SOX9	SOX11	SOX15
nuclear-transcribed mRNA poly(A) tail shortening	22	9	2.04	4.4	+	0.000817	0.0369	25034692	NF	NF	21264220	NF	NF
positive regulation of dendritic spine development	41	13	3.81	3.41	+	0.000469	0.0231	25057212	28864883	NF	NF	27225767	NF
non-motile cilium assembly	45	14	4.18	3.35	+	0.000337	0.0179	20011520	NF	NF	26033091	NF	NF
negative regulation of telomere maintenance	39	12	3.62	3.31	+	0.000954	0.0417	NF	NF	NF	NF	NF	NF
base-excision repair	44	13	4.09	3.18	+	0.000815	0.037	21962512	NF	NF	NF	NF	NF
regulation of mitotic sister chromatid segregation	70	20	6.5	3.08	+	5.43e-05	0.00413	NF	NF	NF	NF	NF	NF
dendrite morphogenesis	60	17	5.57	3.05	+	0.000209	0.0124	25057212	28864883	NF	NF	27225767	NF
establishment of cell polarity	108	30	10.03	2.99	+	1.37e-06	0.000193	NF	28864883	17608734	29084958	NF	NF
recombinational repair	92	25	8.55	2.92	+	1.39e-05	0.00132	NF	NF	NF	NF	NF	NF
cellular response to UV	78	20	7.25	2.76	+	0.000189	0.0114	NF	NF	25488118	27566146	NF	NF
regulation of muscle adaptation	86	21	7.99	2.63	+	0.000307	0.0168	NF	12406576	28943254	22768305	NF	10821863
cell-cell junction assembly	103	25	9.57	2.61	+	7.91e-05	0.00563	NF	NF	NF	NF	NF	NF
protein import into nucleus	105	25	9.76	2.56	+	9.77e-05	0.00651	NF	NF	NF	NF	NF	NF
gene silencing by RNA	84	20	7.8	2.56	+	0.000526	0.0252	NF	NF	NF	NF	NF	NF
ciliary basal body-plasma membrane docking	95	22	8.83	2.49	+	0.000348	0.0182	20011520	28137312	NF	26033091	NF	NF
peptidyl-serine phosphorylation	156	36	14.49	2.48	+	5.84e-06	0.000666	24937695	NF	NF	NF	NF	NF
centrosome cycle	83	19	7.71	2.46	+	0.001	0.0433	NF	NF	NF	NF	NF	NF
mitotic DNA damage checkpoint	99	22	9.2	2.39	+	0.000773	0.0352	NF	NF	NF	27566146	NF	NF
regulation of organelle assembly	185	41	17.19	2.39	+	3.25e-06	0.000409	NA	NA	NA	NA	NA	NA
positive regulation of chromosome organization	163	35	15.14	2.31	+	3e-05	0.00255	NA	NA	NA	NA	NA	NA
regulation of cell-matrix adhesion	110	23	10.22	2.25	+	0.000904	0.0397	26496354	18840685	22492353	18794798	NF	NF
regulation of G2/M transition of mitotic cell cycle	152	31	14.12	2.2	+	0.000244	0.014	NF	NF	NF	NF	NF	NF
spindle organization	134	27	12.45	2.17	+	0.000569	0.027	NF	NF	NF	27758880	NF	NF
regulation of histone modification	139	28	12.91	2.17	+	0.000654	0.0305	NF	NF	NF	16109717	NF	NF
cellular response to insulin stimulus	157	31	14.59	2.13	+	0.000324	0.0175	28607354	28585545	NF	21983268	NF	NF
regulation of macroautophagy	157	30	14.59	2.06	+	0.000814	0.037	23451179	NF	NF	NF	NF	NF
mitotic cell cycle phase	216	41	20.07	2.04	+	0.000102	0.00671	NF	NF	NF	NF	NF	NF
negative regulation of mitotic cell cycle phase transition	165	31	15.33	2.02	+	0.00071	0.033	NF	NF	NF	NF	NF	NF
regulation of microtubule cytoskeleton organization	182	34	16.91	2.01	+	0.000493	0.024	NF	NF	NF	NF	NF	NF
axon guidance	241	45	22.39	2.01	+	6.2e-05	0.00462	28743796	18840685	NF	27235933	29746989	NF
Supplemental Table S4B: Gene Ontology terms associated with genes that contain more than one copy of UW.Motif.0167 in their promoters. The number of genes in the term, the number of genes in the set that belong to the indicated term, the expected number of genes in the set belonging to the indicated term, the fold enrichment, and direction of enrichment are indicated. The raw p-values and the FDR…
