# Supplementary material for: Discovering human transcription factor physical interactions with genetic variants, novel DNA motifs, and repetitive elements using enhanced yeast one-hybrid assays
Source: HighWire-hosted journal article supplement (doi:10.1101/gr.248823.119), 2019-09-01
Supplement: Supplemental_Table_S5.xlsx [file Supplemental_Table_S5.xlsx]

## Sheet: Mutations tested
Mutation	Cancer type	PMID	Recurrence ( COSMIC)	COSMIC Mutation ID	Genomic coordinate (hg38)	Wild type sequence	Mutant sequence
-138/-139 GG->AA	Melanoma, Urinary tract, eye	24215939, 23348503	148	1716560	1295127-1295128	GCTGGGCCGGGGACCCGGGAGG	GCTGGGCCGGAAACCCGGGAGG
-94 A->C	Urinary tract	25843513	NA	NA	1295083	GGGCCGCGGAAAGGAAGGGGA	GGGCCGCGGACAGGAAGGGGA
-80 G->A	Urinary tract	25843513	1	5023000	1295069	GCGGCCCCGCCCTCTCCTCGC	GCGGCCCCGCTCTCTCCTCGC
-86 G->A	Urinary tract	25843513	1	5022999	1295075	AGAGGGCGGGGCCGCGGAAAG	AGAGGGCGGGACCGCGGAAAG
-45 C->A	Urinary tract	24035680, 25843513	6	1717369	1295034	CGCAGCAGGACGCAGCGCTGC	CGCAGCAGGAAGCAGCGCTGC
-72 G->C, -77 G->A	Urinary tract	24035680	NA	NA	1295061 and 1295066	CTCGCGCCGCGAGGAGAGGGCGGGGC	CTCGCGCCGCCAGGAAAGGGCGGGGC
-146 G->A	Melanoma, central nervous system, urinary tract, thyroid	25843513, 26194807	2554	1716559	1295135	GGGGACCCGGGAGGGGTCGGG	GGGGACCCGGAAGGGGTCGGG
Supplemental Table S5A: Mutations in the TERT promoter evaluated by eY1H assays. The mutation position, cancer type where the mutations were identified, PMIDs of references, recurrence in COSMIC and COSMIC mutation ID, genomic coordinate, and wildtype and mutant sequences are indicated.

## Sheet: Interaction results
Mutant	TF	Gain/Loss by eY1H	Motif evidence	Luciferase assay (2-way ANOVA interaction term p<0.01)
-138/-139 GG->AA	ELK1	Gain	Yes (differential)	3 of 3
-138/-139 GG->AA	ELK4	Gain	Yes (differential)	2 of 3
-138/-139 GG->AA	GABPA	Gain	Yes (differential)	3 of 3
-138/-139 GG->AA	ERF	Gain	Yes (differential)	2 of 3
-138/-139 GG->AA	ETV1	Gain	Yes (differential)	3 of 3
-138/-139 GG->AA	ELF2	Gain	Yes (differential)	1 of 3
-86 G->A	GABPA	Gain	No	0 of 3
-86 G->A	THRB	Gain	No	0 of 3
-86 G->A	HHEX	Gain	No motif available	0 of 2
-86 G->A	SOX14	Gain	No	0 of 3
-86 G->A	KLF4	Loss	Yes (both alleles but stronger in wild type)	0 of 4
-86 G->A	KLF2	Loss	Yes (both alleles but stronger in wild type)	0 of 3
-94 A->C	ELK1	Gain	Yes (both alleles but stronger in mutant)	1 of 3
-94 A->C	IRX5	Gain	No	Not tested
-94 A->C	HEY1	Gain	No	Not tested
-94 A->C	ELK4	Gain	Yes (both alleles but stronger in mutant)	0 of 3
-94 A->C	ZBTB14	Gain	No	Not tested
-94 A->C	GABPA	Gain	Yes (both alleles but stronger in mutant)	4 of 4
-94 A->C	KLF3	Gain	No	0 of 3
-94 A->C	PLAGL1	Gain	No	Not tested
-94 A->C	DBX1	Gain	No	Not tested
-94 A->C	HEY2	Gain	No	0 of 3
-94 A->C	PLAG1	Gain	No	Not tested
-94 A->C	HES5	Gain	No	0 of 2
-94 A->C	MAFG	Loss	No	0 of 3
-80 G->A	ZFP161	Loss	No	0 of 2
-80 G->A	GMEB1	Loss	No	2 of 3
-80 G->A	KLF3	Loss	Yes (both alleles but stronger in wild type)	2 of 3
-80 G->A	KLF4	Loss	Yes (both alleles but stronger in wild type)	2 of 3
-80 G->A	KLF2	Loss	Yes (both alleles but stronger in wild type)	0 of 3
-80 G->A	HES5	Loss	No	3 of 3
-45 C->A	ELK1	Gain	Yes (differential)	0 of 2
-45 C->A	SOX14	Loss	No	0 of 2
-72 G->C, -77 G->A	KLF3	Gain	No (motif in both alleles equally strong)	3 of 5
-146 G->A	GABPA	Gain	Yes (differential)	2 of 2
-146 G->A	ERF	Gain	Yes (differential)	3 of 4
Supplemental Table S5B: Functional evaluation of mutations in the TERT promoter. For the indicated mutations, the TFs involved in gain or loss of eY1H interaction are indicated. Motif evidence for the gain or loss of interaction, and the number of significant luficerase assays of the 2-4 independent replicates tested are shown.
